# Supplementary material for: Efficient recovery of Cr(vi) from electroplating wastewater by iron-modified sludge-based hollow-structured porous carbon: coexistence effects and competition for adsorption
Source: Royal Society of Chemistry journal article supplement (doi:10.1039/d1ra06969a), 2021-01-01
Supplement: d1ra06969a1.pdf [file d1ra06969a1.pdf]

**Efficient recovery of Cr(VI) from electroplating wastewater by iron modified sludge-based hollow structured porous carbon: Coexistence affects and competes for adsorption**

Han Cheng<sup>1</sup>, Yali Liu<sup>1\*</sup>, Xin Li<sup>2</sup>, Haidong He<sup>1</sup>, Xiaorong Kang<sup>3</sup>

<sup>1</sup> School of Civil Engineering, Nanjing Forestry University, Nanjing 210037, China; deji1116@163.com

<sup>2</sup> School of Environment, Harbin Institute of Technology, Harbin 150090, China; lixinharbin@163.com

<sup>3</sup> School of Environment Engineering, Nanjing Institute of Technology, Nanjing 211167, China

\*Correspondence author: School of Civil Engineering, Nanjing Forestry University, Nanjing 210037, China.

Tel.: +86-15720628696. E-mail: liuyali0418@163.com (Y. Liu).

**SUPPLEMENTARY INFORMATION**

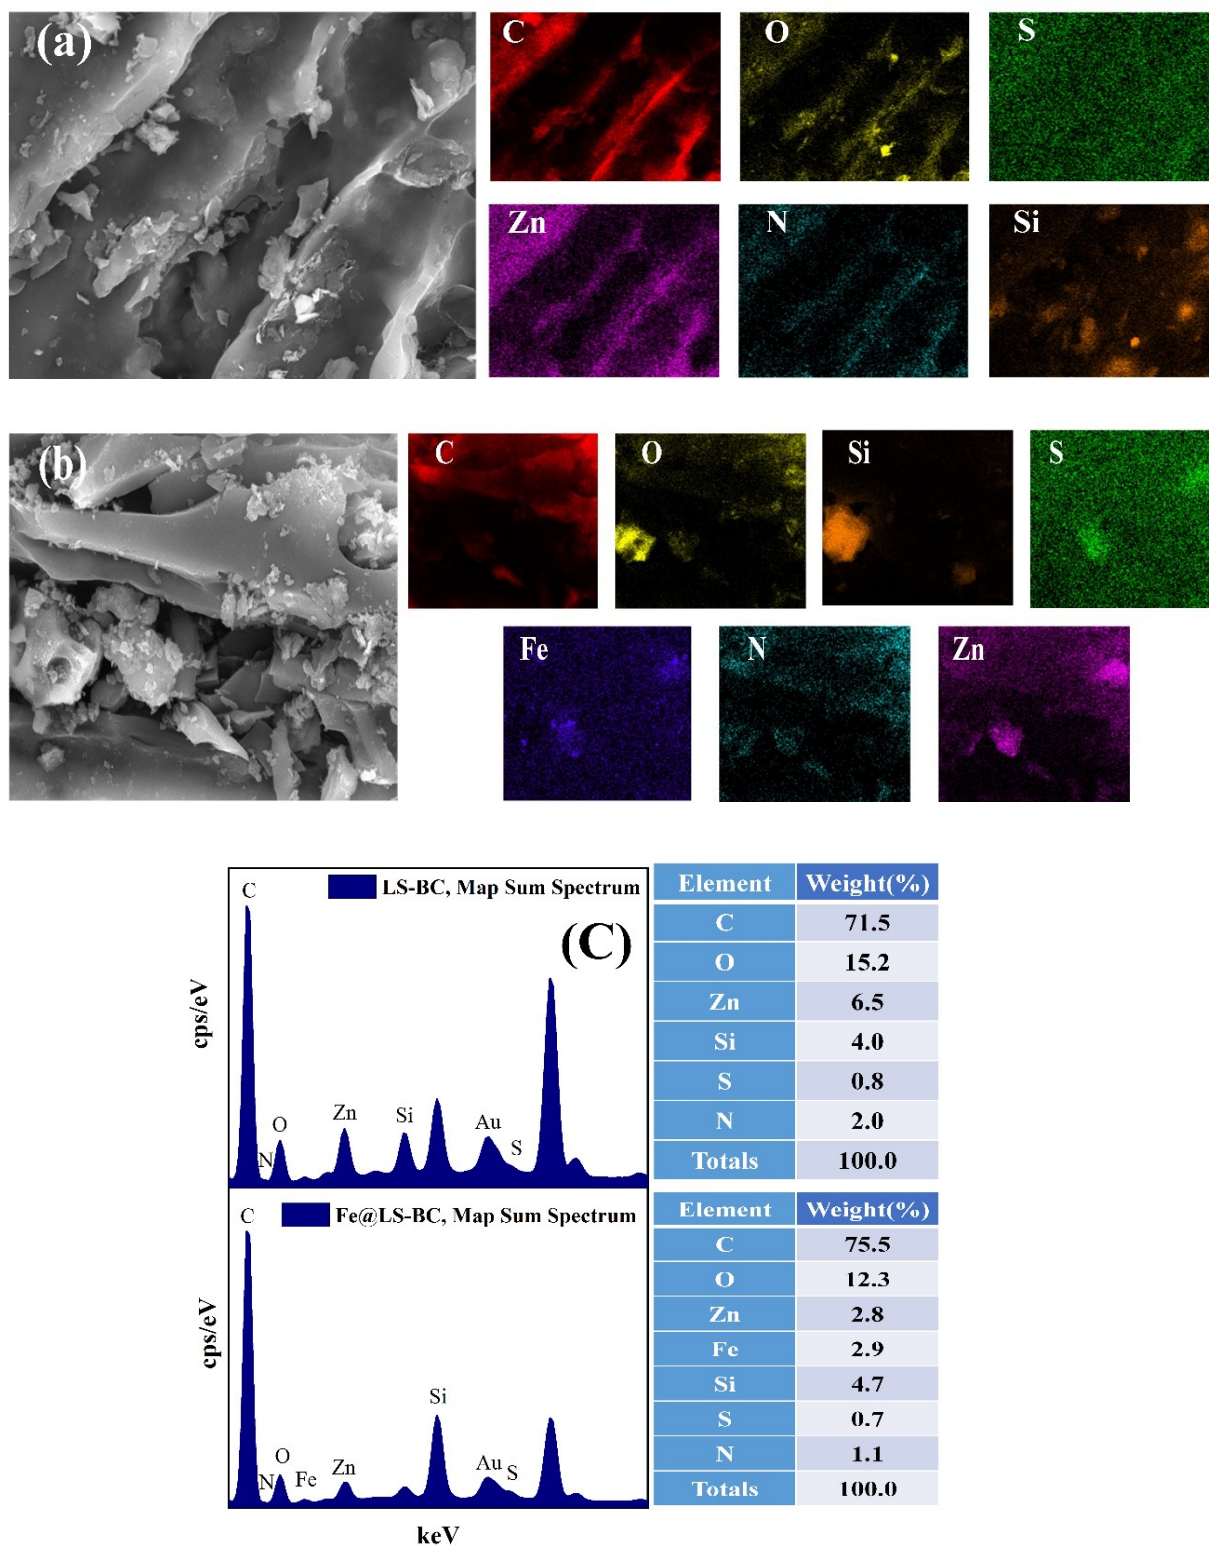

**Figure. S1.** Elemental mapping of (a) LS-AC, (b) Fe@LS-BC and (c) EDS spectra of LS-BC and Fe@LS-BC.

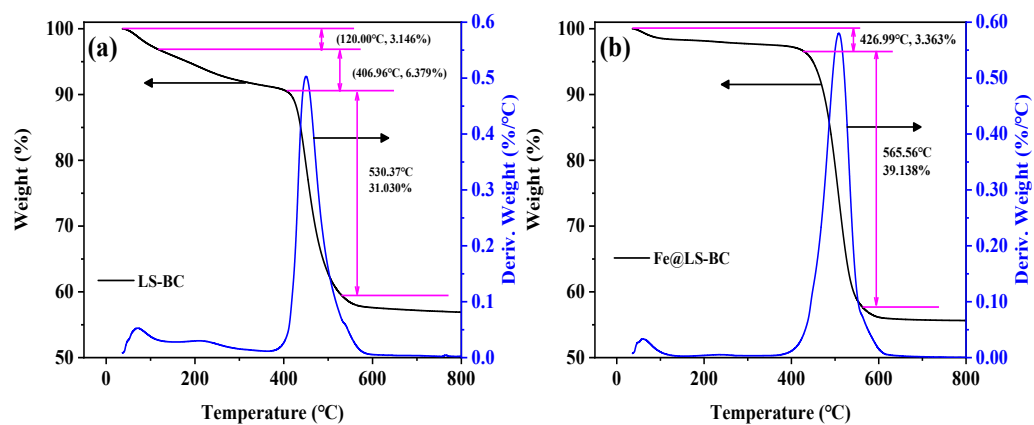

**Figure. S2.** TGA and DTG curves of (a) LS-BC, and (b) Fe@LS-BC.

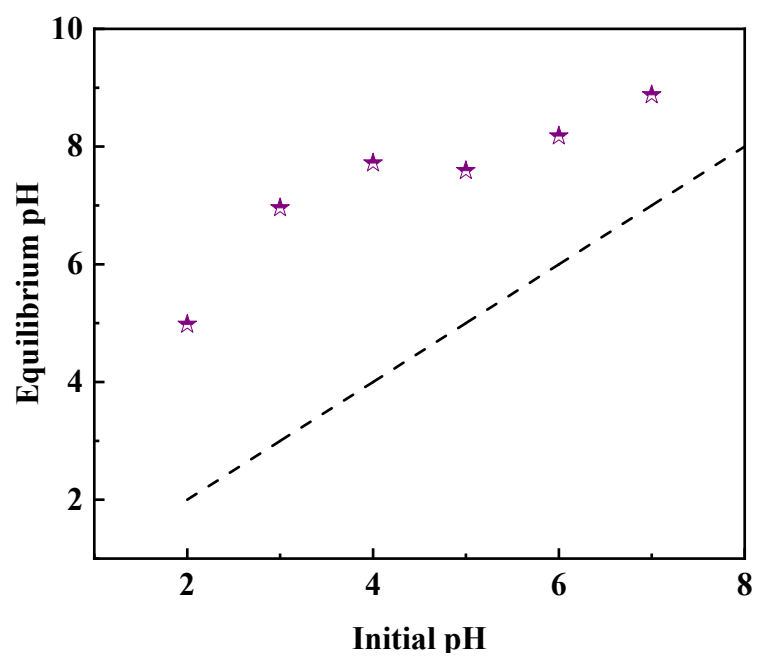

**Figure. S3.** pH at equilibrium for adsorption of Cr(VI) by Fe@LS-BC (constant duration 360 min; temperature 25°C; initial concentration of Cr(VI) was 50 mg/L; adsorbent dose 0.4 g/L).

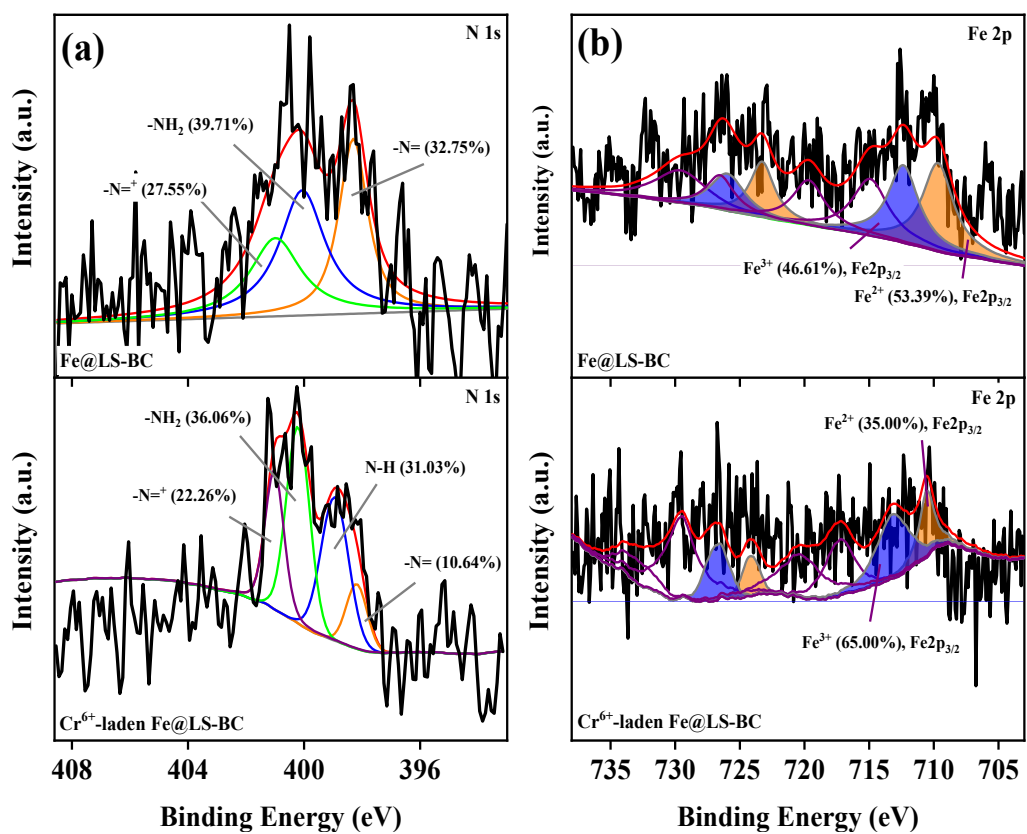

**Fig. S4.** XPS spectra of Fe@LS-BC (a) survey for N 1s before and after Cr(VI) adsorption, and (b) survey for Fe 2p before and after Cr(VI) adsorption.

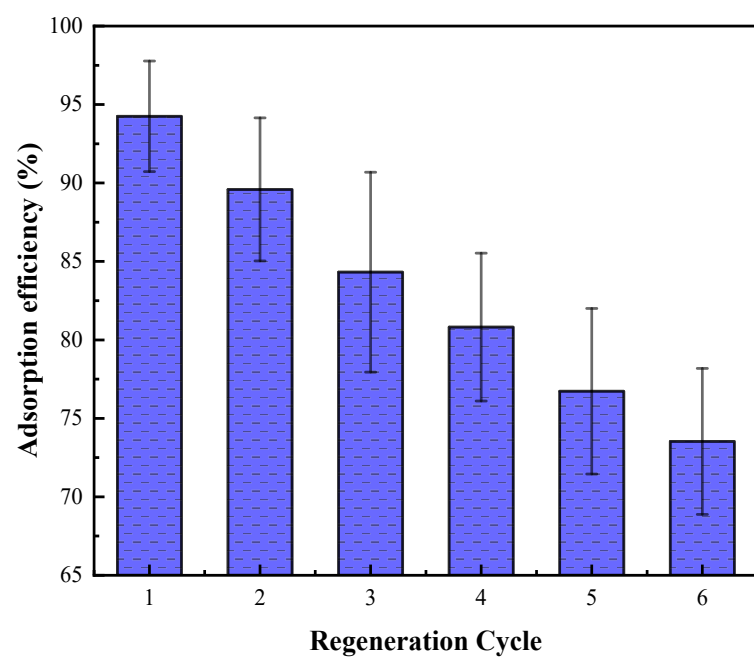

**Fig. S5.** Adsorption efficiencies of Cr(VI) after regeneration (six cycles).

Figure Legends:

**Figure. S1.** Elemental mapping of (a) LS-AC, (b) Fe@LS-BC and (c) EDS spectra of LS-BC and Fe@LS-BC.

**Figure. S2.** TGA and DTG curves of (a) LS-BC, and (b) Fe@LS-BC.

**Figure. S3.** pH at equilibrium for adsorption of Cr(VI) by Fe@LS-BC (constant duration 360 min; temperature 25°C; initial concentration of Cr(VI) was 50 mg/L; adsorbent dose 0.4 g/L).

**Figure. S4.** XPS spectra of Fe@LS-BC (a) survey for N 1s before and after Cr(VI) adsorption, and (b) survey for F2 2p before and after Cr(VI) adsorption.

**Figure. S5.** Adsorption efficiencies of Cr(VI) after regeneration (six cycles).

**Table. S1.** Characteristics of methyl orange.

| Compound      | Chemical formula        | Molecular weight (g/mol) | Structure formula                                                                    |
|---------------|-------------------------|--------------------------|--------------------------------------------------------------------------------------|
| Methyl orange | $C_{14}H_{14}N_3SO_3Na$ | 327.33                   |  |

**Table. S2.** Physical Characteristics of pore structure of Fe@LS-BC.

| Samples  | $S_{\text{BET}}$ (m <sup>2</sup> /g) | Micropore Surface<br>Area (m <sup>2</sup> /g) | $V_{\text{mic}}$ (cm <sup>3</sup> /g) | $V_{\text{T}}$ (cm <sup>3</sup> /g) | $D_{\text{p}}$ (nm) |
|----------|--------------------------------------|-----------------------------------------------|---------------------------------------|-------------------------------------|---------------------|
| Fe@LS-BC | 243.823                              | 87.670                                        | 0.040                                 | 0.302                               | 4.958               |
